# Supplementary material for: The effect of solvents on the thermal degradation products of two Amadori derivatives
Source: Royal Society of Chemistry journal article supplement (doi:10.1039/c9ra09854b), 2020-01-01
Supplement: c9ra09854b1.pdf [file c9ra09854b1.pdf]

## Supplementary Materials

# The effect of solvents on the thermal degradation products of two Amadori derivatives

Shiyi Zhang, Rui Li\*, Yudan Zhang, and Mingqin Zhao\*

College of Tobacco Science, Henan Agricultural University, Zhengzhou 450002, China;

\* Correspondence: [15238318869@163.com](mailto:15238318869@163.com) (R.L.); [zhaomingqin@126.com](mailto:zhaomingqin@126.com) (M.Z.);

### Contents

1.  $^1\text{H}$  NMR,  $^{13}\text{C}$  NMR, and TLC graphs of Derivative1.
2.  $^1\text{H}$  NMR and  $^{13}\text{C}$  NMR of Derivative2.
3. Total ion chromatograms from pyrolysis of Derivative1 and Derivative2 at 350 °C.
4. Total ion chromatograms from thermal degradation of Derivative1 and Derivative2 in water at 120 and 180 °C.
5. Total ion chromatograms from thermal degradation of Derivative1 and Derivative2 in ethanol at 120 and 180 °C.
6. Mass spectra of degradation compounds extracted from total ion chromatograms.
7. Proposed degradation mechanisms of Derivative2

1.  $^1\text{H}$  NMR,  $^{13}\text{C}$  NMR, and TLC graphs of Derivative1.

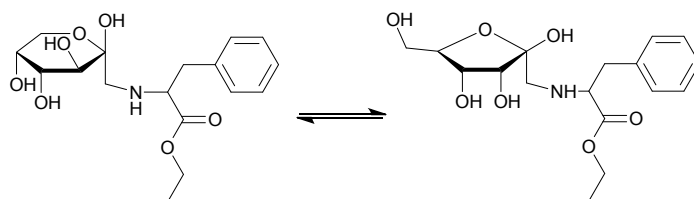

**Scheme S1** Pyranose fom (left) and furanose form (right) of Derivative1.

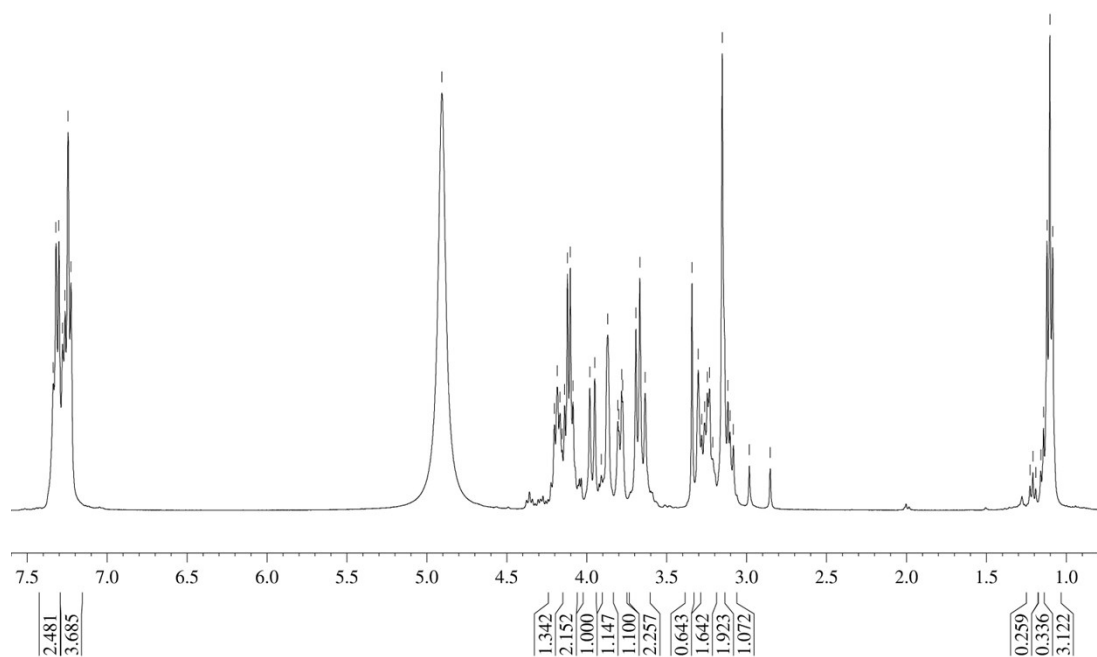

**Fig. S1**  $^1\text{H}$  NMR spectra of Derivative1 measured in MeOD at 25 °C.

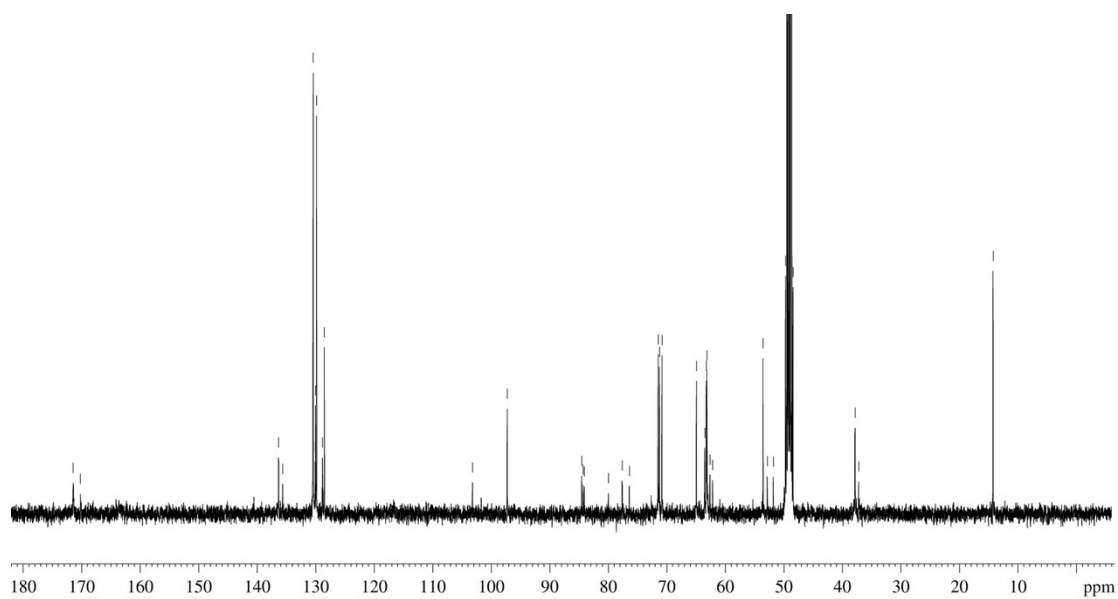

**Fig. S2**  $^{13}\text{C}$  NMR spectra of Derivative1 measured in MeOD at 25 °C.

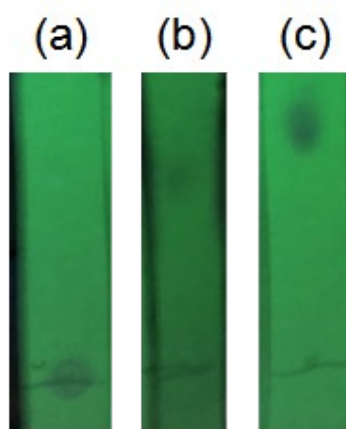

**Fig. S3** TLC analysis of Derivative1 in different solvent systems. (a) Ethyl acetate : Petroleum ether = 1 : 3 (v/v); (b) Methanol : Ethyl acetate = 1 : 3 (v/v); (c) Methanol : Ethyl acetate = 1 : 1 (v/v).

2.  $^1\text{H}$  NMR and  $^{13}\text{C}$  NMR of Derivative2.

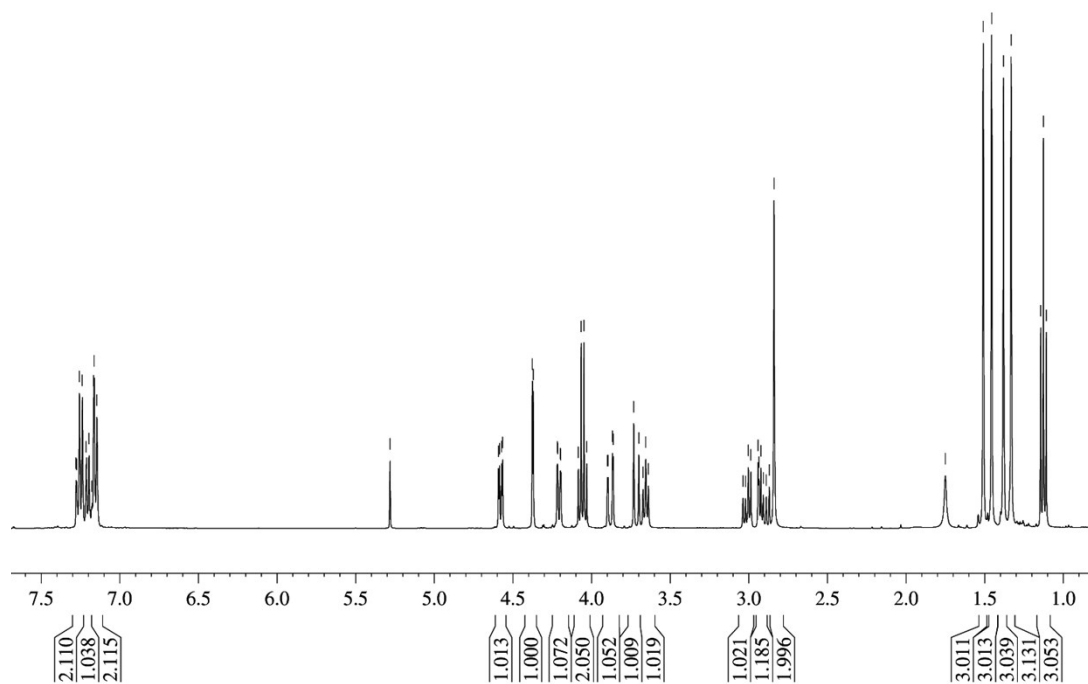

**Fig. S4**  $^1\text{H}$  NMR spectra of Derivative2 measured in  $\text{CDCl}_3$  at 25 °C.

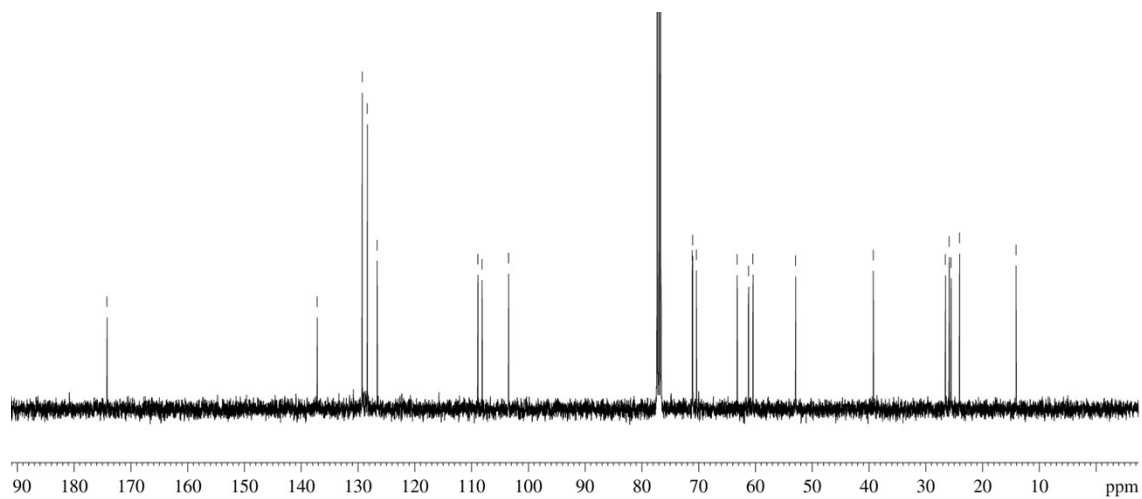

**Fig. S5**  $^{13}\text{C}$  NMR spectra of Derivative2 measured in  $\text{CDCl}_3$  at 25 °C.

3. Total ion chromatograms from pyrolysis of Derivative1 and Derivative2 at 350 °C.

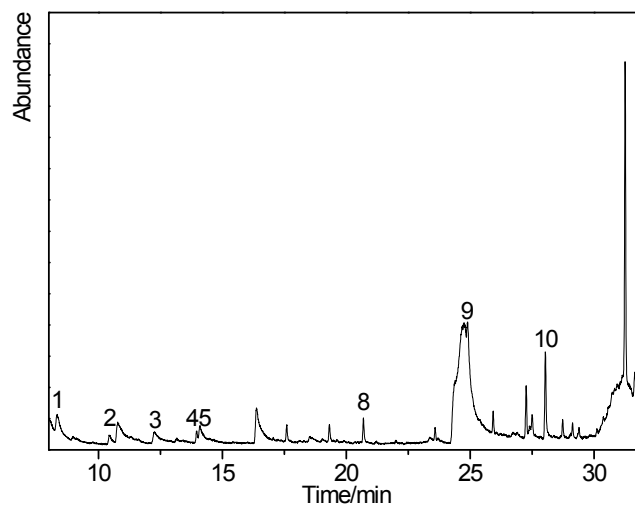

**Fig. S6** Total ion chromatograms from pyrolysis of Derivative1 at 350 °C (Numbers are correspondence to the compounds in Table 2; The unlabeled peaks refer to the compounds with the match values below 80%.)

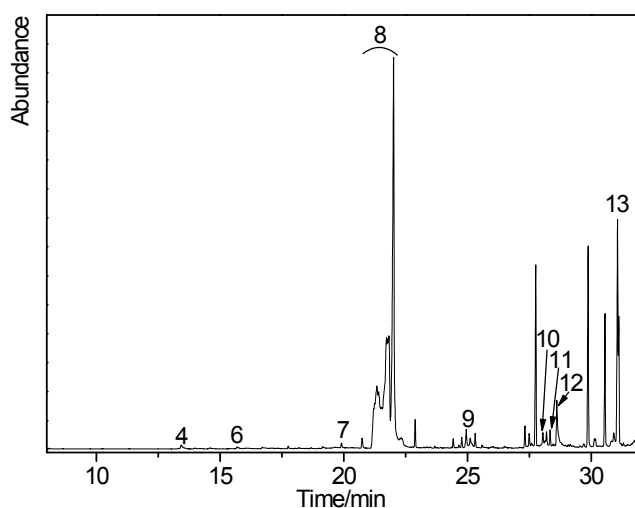

**Fig. S7** Total ion chromatograms from pyrolysis of Derivative2 at 350 °C (Numbers are correspondence to the compounds in Table 2; The unlabeled peaks refer to the compounds with the match values below 80%.)

4. Total ion chromatograms from thermal degradation of Derivative1 and Derivative2 in water at 120 and 180 °C.

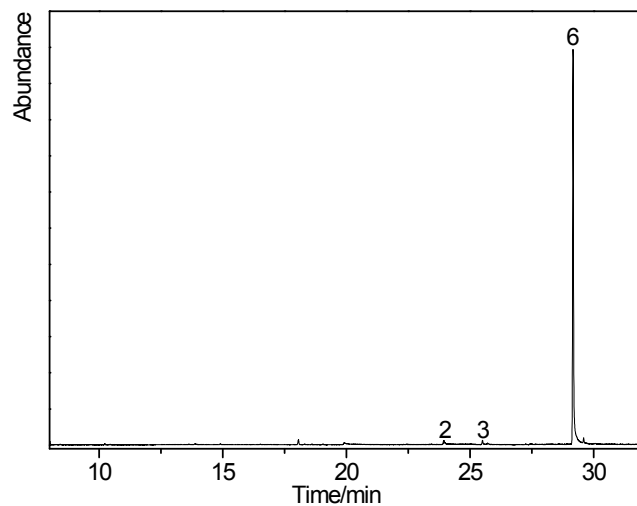

**Fig. S8** Total ion chromatograms from thermal degradation of Derivative1 in water at 120 °C  
(Numbers are correspondence to the compounds in Table 3)

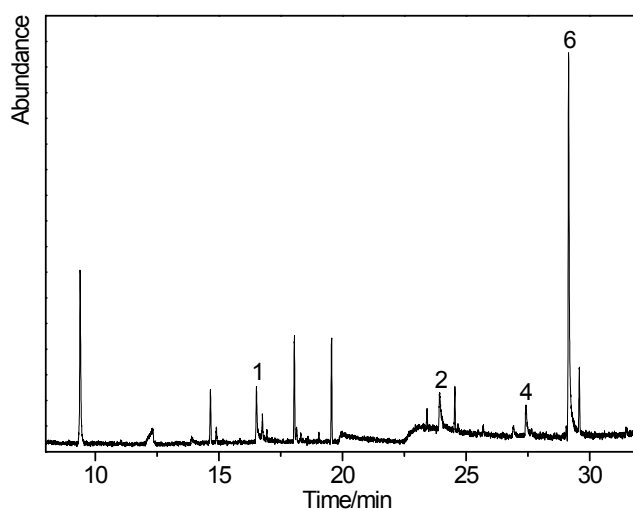

**Fig. S9** Total ion chromatograms from thermal degradation of Derivative1 in water at 180 °C  
(Numbers are correspondence to the compounds in Table 3; The unlabeled peaks refer to the compounds with the match values below 80%.)

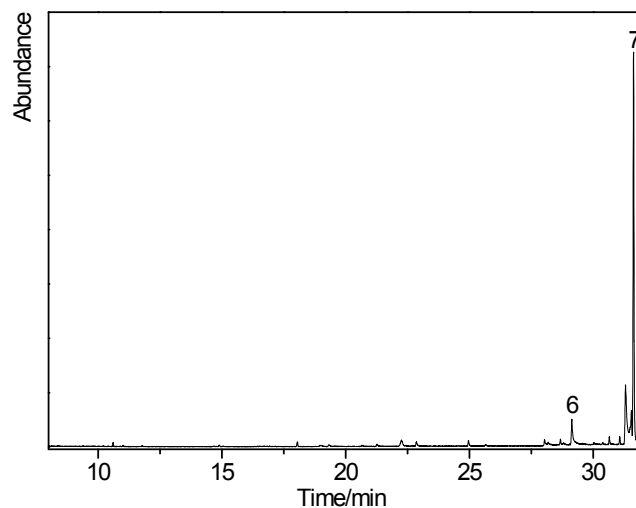

**Fig. S10** Total ion chromatograms from thermal degradation of Derivative2 in water at 120 °C (Numbers are correspondence to the compounds in Table 3; The unlabeled peaks refer to the compounds with the match values below 80%.)

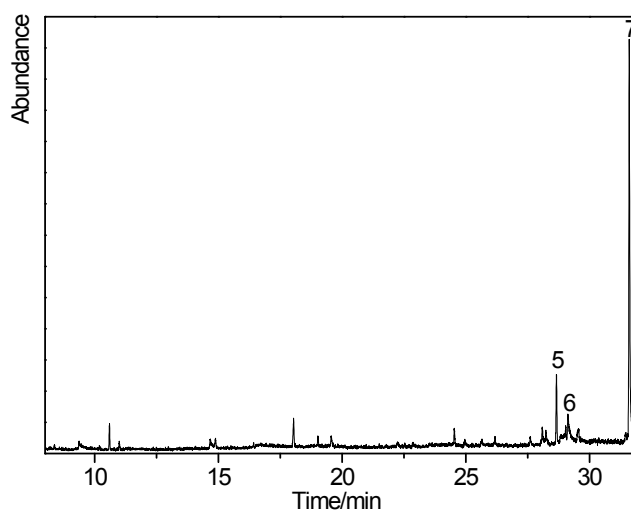

**Fig. S11** Total ion chromatograms from thermal degradation of Derivative2 in water at 180 °C (Numbers are correspondence to the compounds in Table 3; The unlabeled peaks refer to the compounds with the match values below 80%.)

5. Total ion chromatograms from thermal degradation of Derivative1 and Derivative2 in ethanol at 120 and 180 °C.

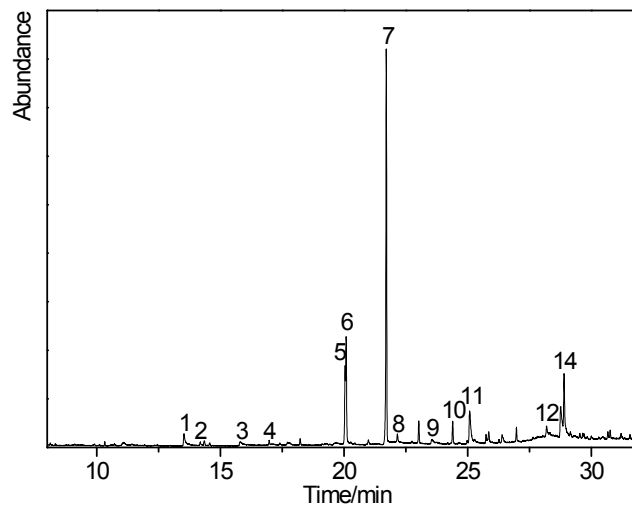

**Fig. S12** Total ion chromatograms from thermal degradation of Derivative1 in ethanol at 120 °C (Numbers are correspondence to the compounds in Table 4; The unlabeled peaks refer to the compounds with the match values below 80%.)

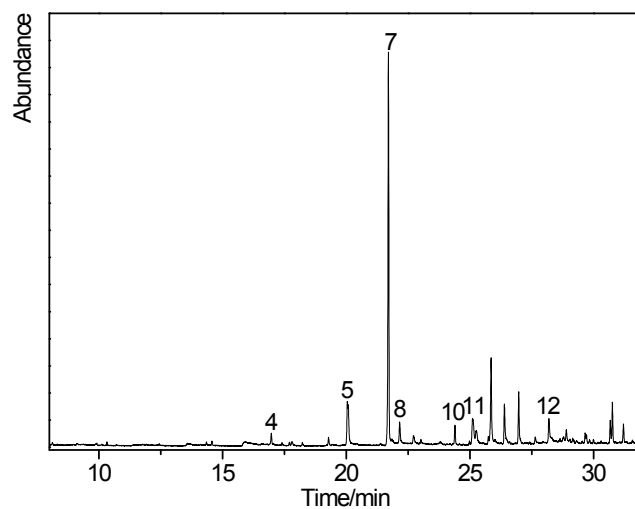

**Fig. S13** Total ion chromatograms from thermal degradation of Derivative1 in ethanol at 180 °C (Numbers are correspondence to the compounds in Table 4; The unlabeled peaks refer to the compounds with the match values below 80%.)



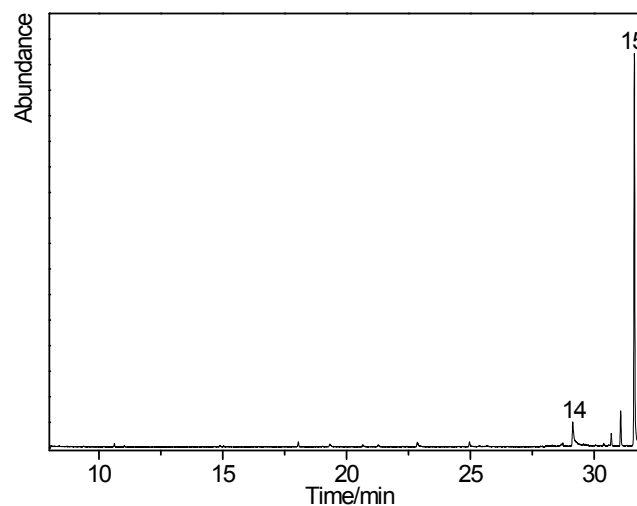

**Fig. S14** Total ion chromatograms from thermal degradation of Derivative2 in ethanol at 120 °C (Numbers are correspondence to the compounds in Table 4; The unlabeled peaks refer to the compounds with the match values below 80%.)

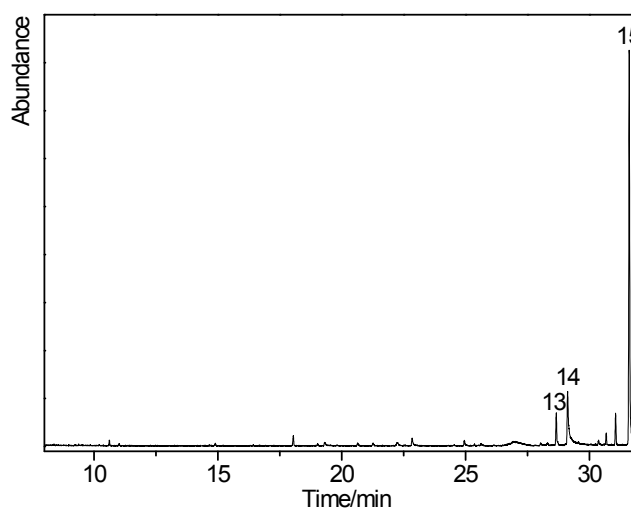

**Fig. S15** Total ion chromatograms from thermal degradation of Derivative2 in ethanol at 180 °C (Numbers are correspondence to the compounds in Table 4; The unlabeled peaks refer to the compounds with the match values below 80%.)

6. Mass spectra of degradation compounds extracted from total ion chromatograms.

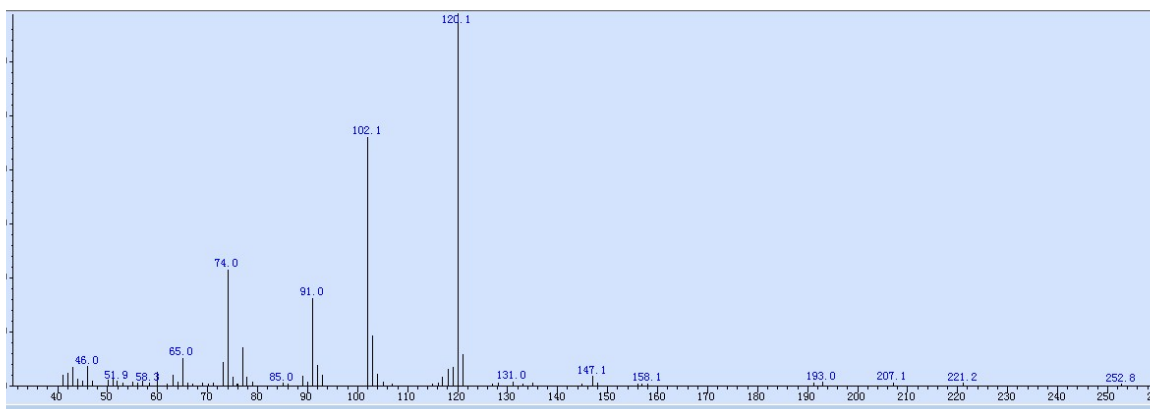

**Fig. S16** Mass spectrum of phenylalanine ethyl ester extracted from total ion chromatogram.

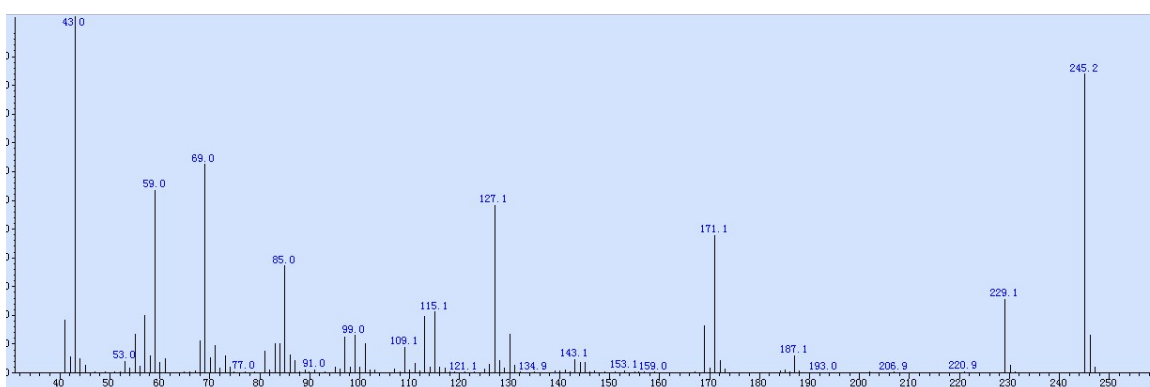

**Fig. S17** Mass spectrum of diacetonefructose extracted from total ion chromatogram.

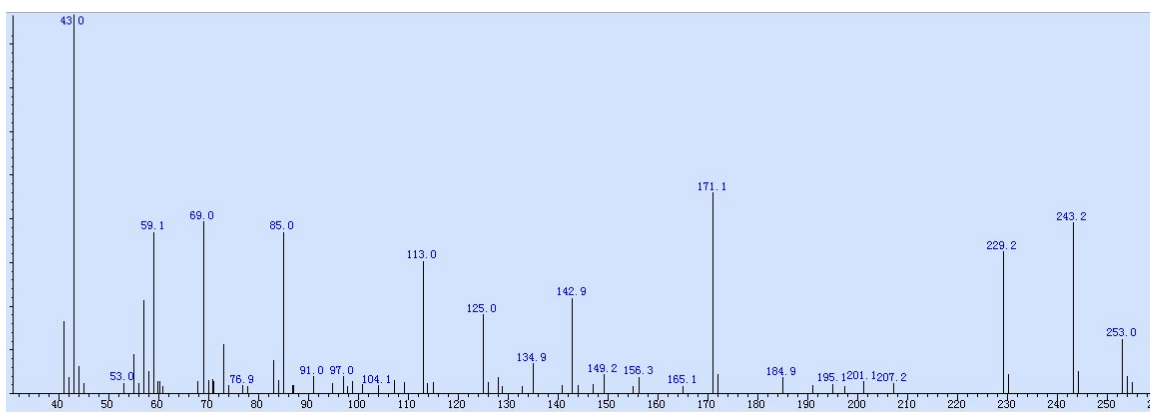

**Fig. S18** Mass spectrum of 2,3:4,5-bis-*O*-(1-methylethylidene)- $\beta$ -D-arabino-Hexos-2-ulo-2,6-pyranose extracted from total ion chromatogram.

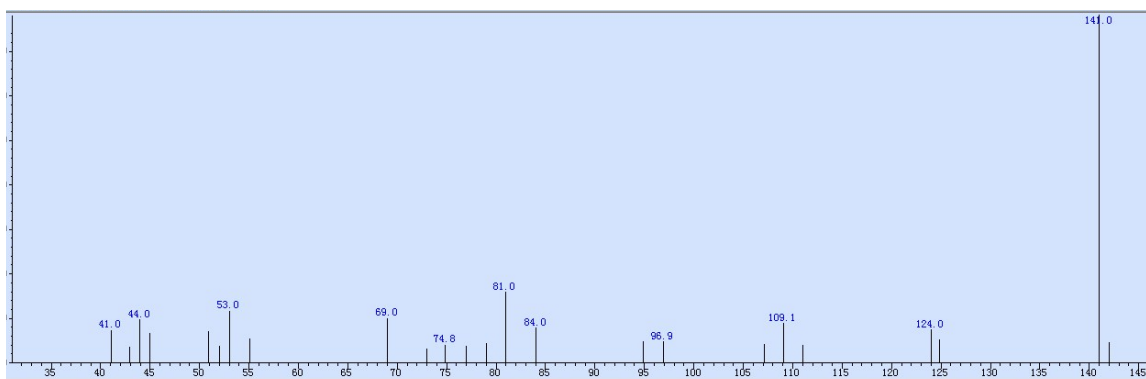

**Fig. S19** Mass spectrum of 5-(dimethoxymethyl)-2-furanmethanol extracted from total ion chromatogram.

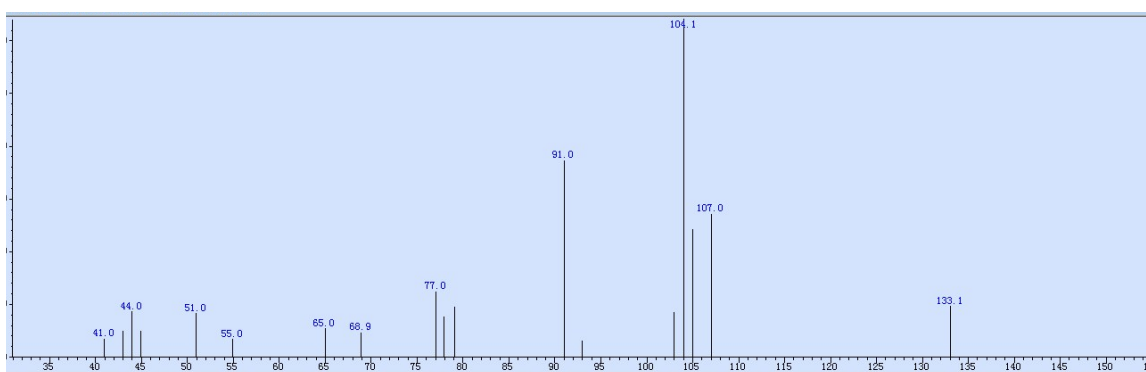

**Fig. S20** Mass spectrum of ethyl-3-phenylpropionate extracted from total ion chromatogram.

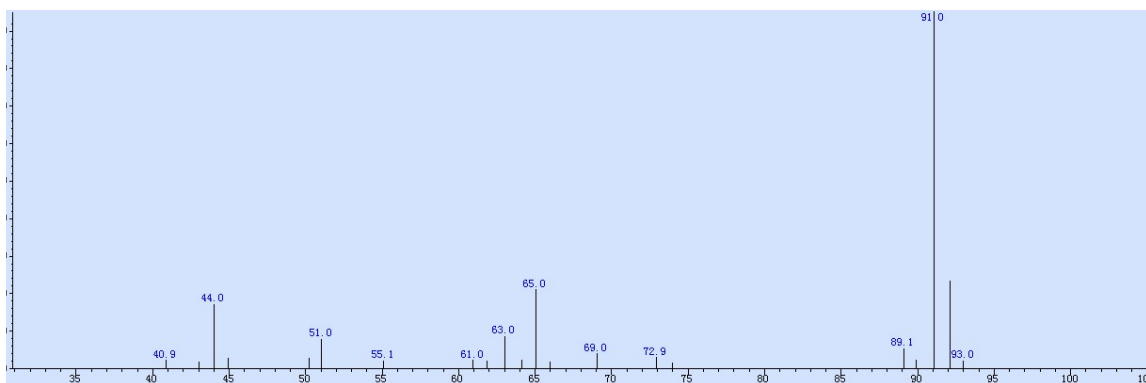

**Fig. S21** Mass spectrum of phenylacetaldehyde extracted from total ion chromatogram.

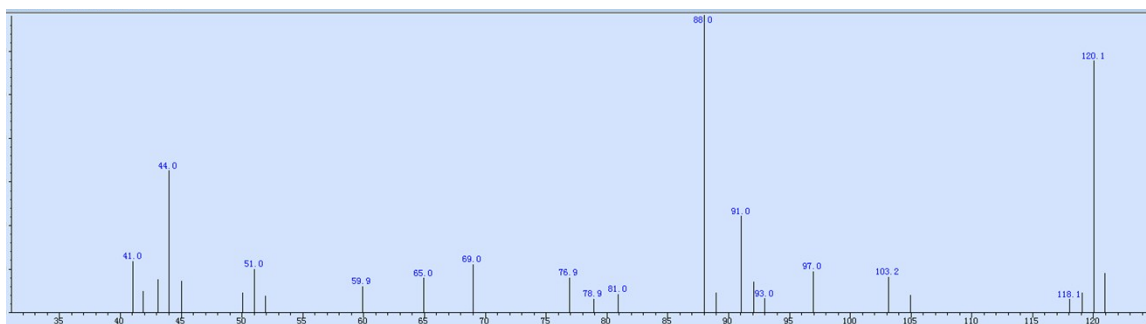

**Fig. S22** Mass spectrum of methyl-2-amino-3-phenylpropanoate extracted from total ion chromatogram.

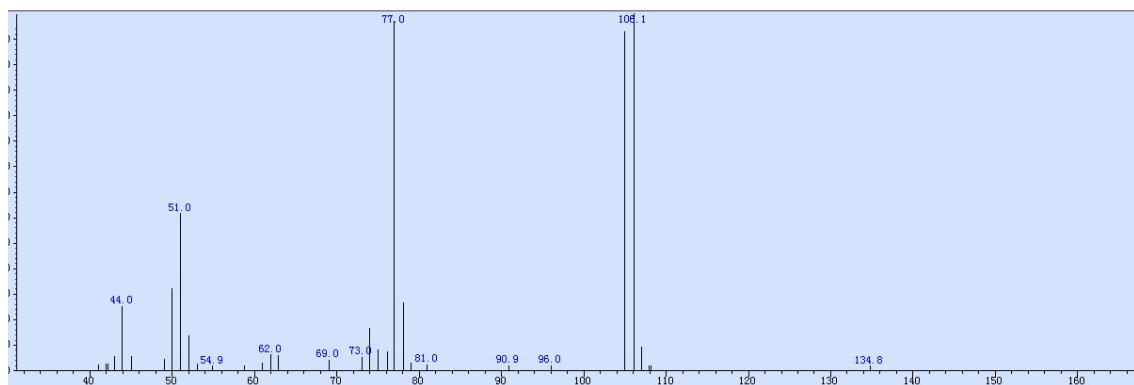

**Fig. S23** Mass spectrum of benzaldehyde extracted from total ion chromatogram.

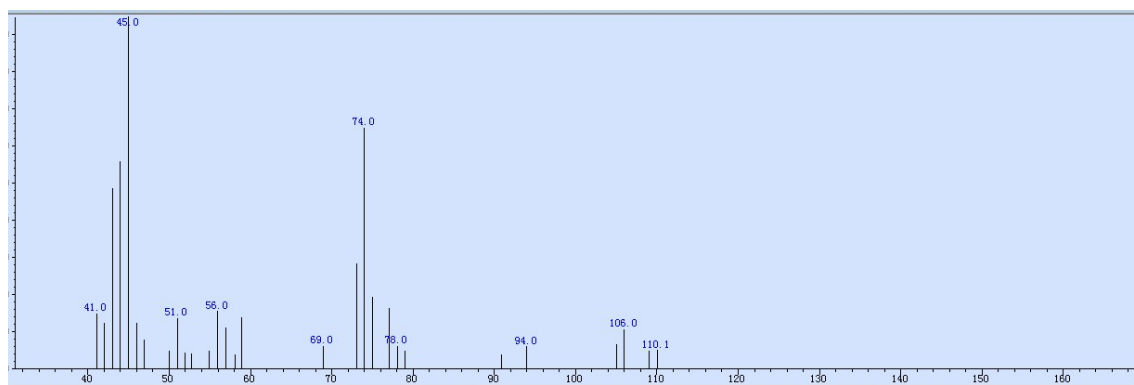

**Fig. S24** Mass spectrum of diethyl oxalate extracted from total ion chromatogram.

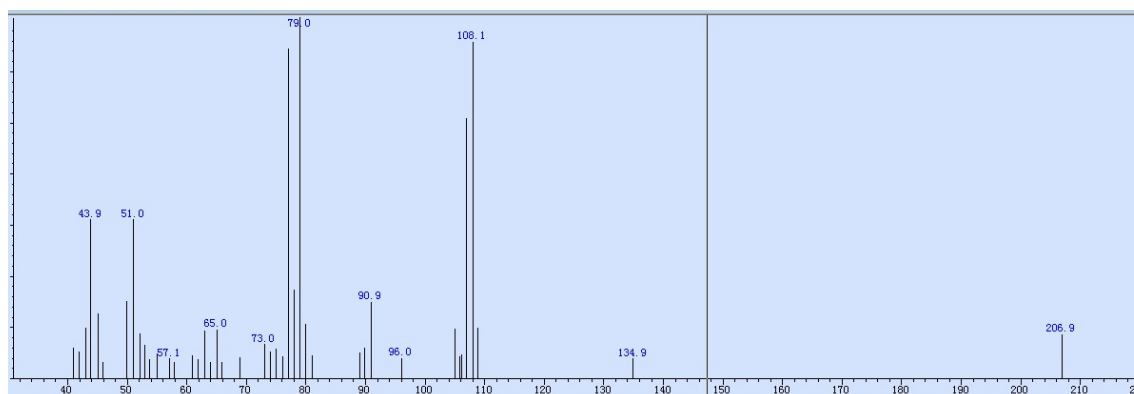

**Fig. S25** Mass spectrum of phenylmethanol extracted from total ion chromatogram.

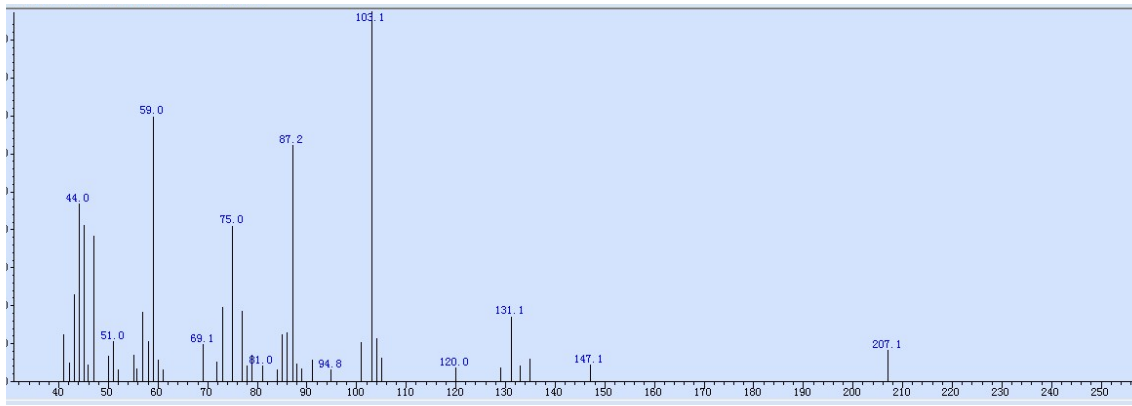

**Fig. S26** Mass spectrum of 1,1,3-triethoxypropane extracted from total ion chromatogram.

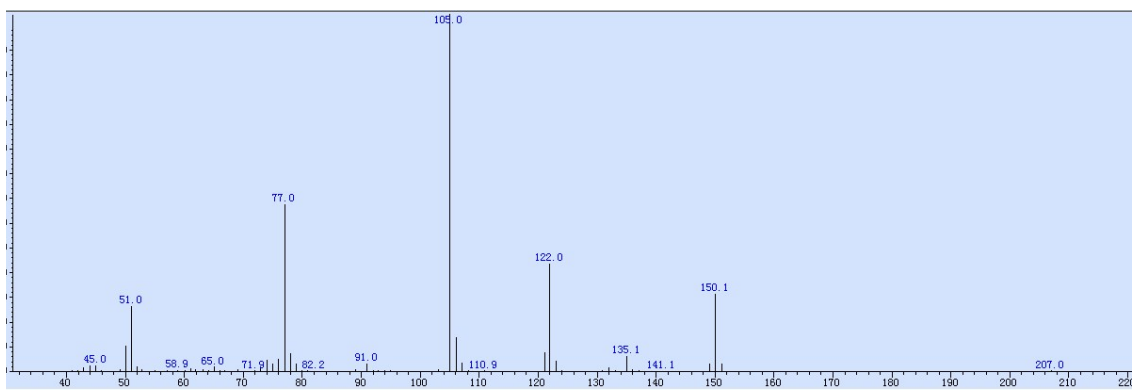

**Fig. S27** Mass spectrum of ethyl benzoate extracted from total ion chromatogram.

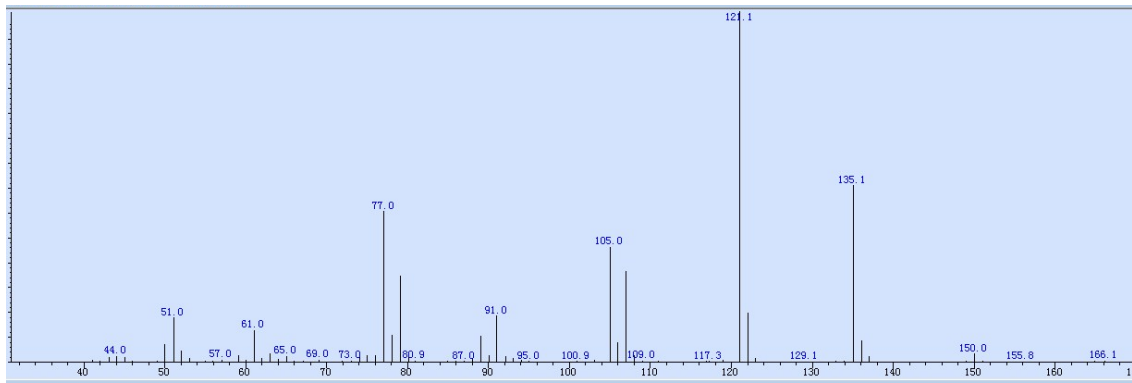

**Fig. S28** Mass spectrum of 2-methoxy-2-phenylacetic acid extracted from total ion chromatogram.

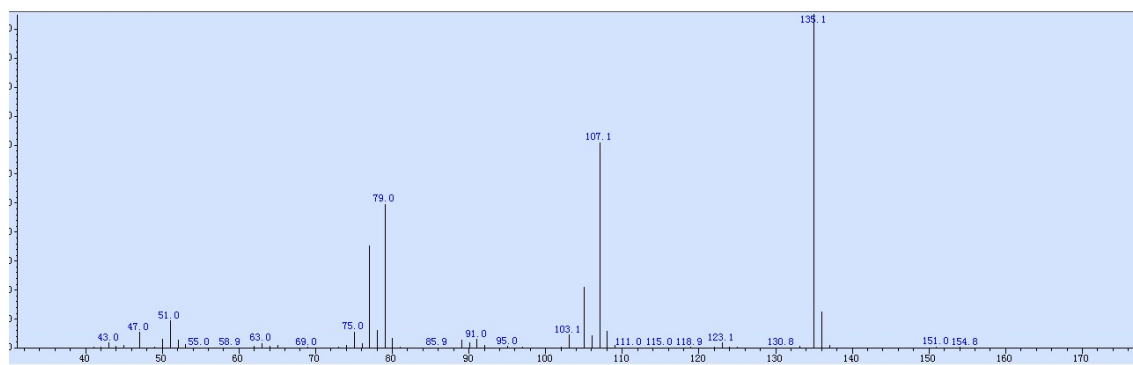

**Fig. S29** Mass spectrum of benzaldehyde diethyl acetal extracted from total ion chromatogram.

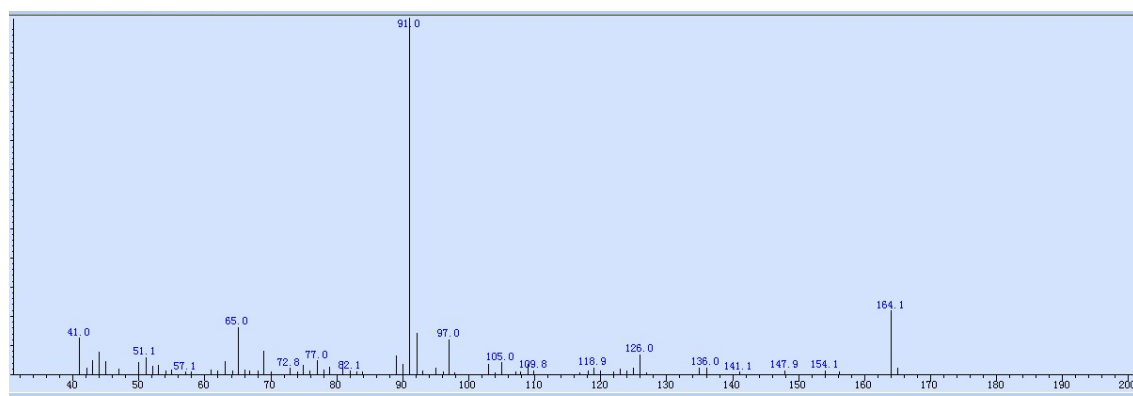

**Fig. S30** Mass spectrum of ethyl phenylacetate extracted from total ion chromatogram.

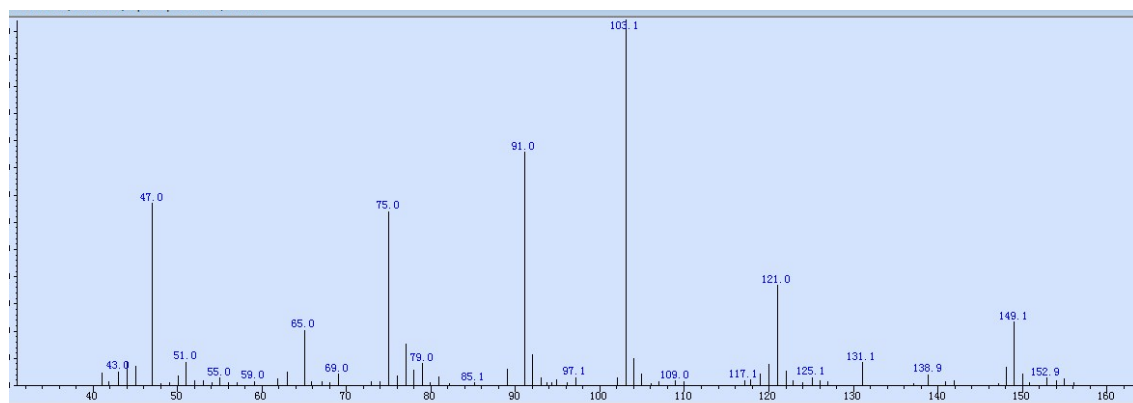

**Fig. S31** Mass spectrum of (2,2-diethoxyethyl)benzene extracted from total ion chromatogram.

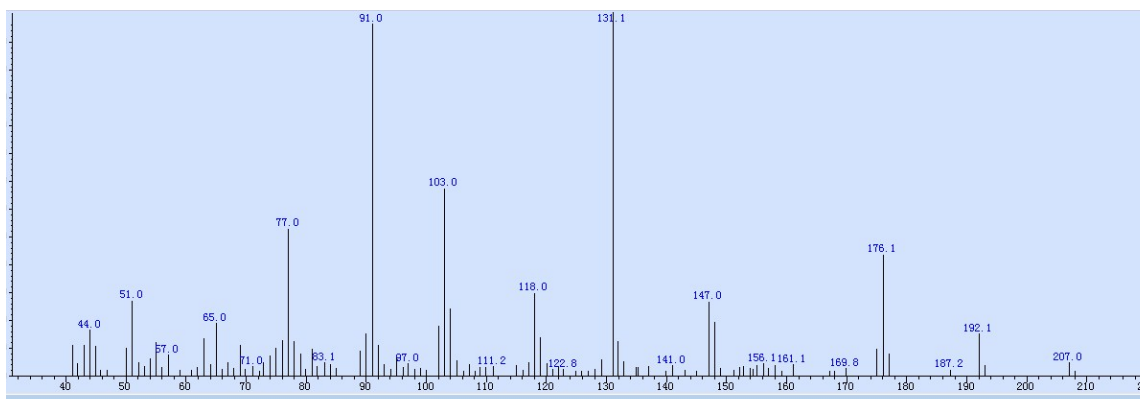

**Fig. S32** Mass spectrum of ethyl cinnamate extracted from total ion chromatogram.

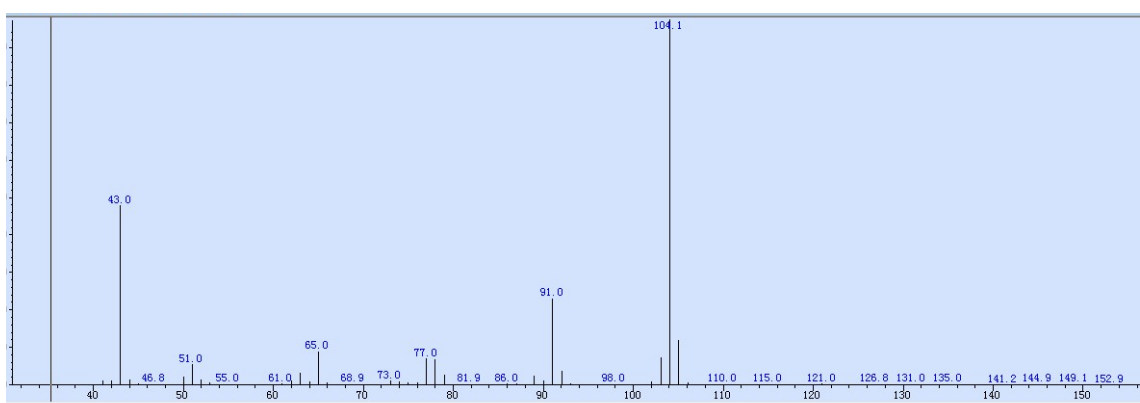

**Fig. S33** Mass spectrum of phenethyl acetate extracted from total ion chromatogram.

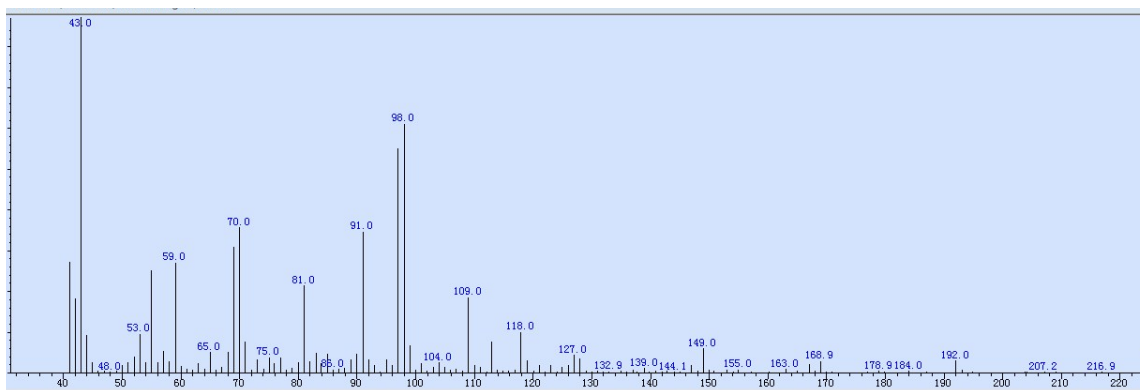

**Fig. S34** Mass spectrum of 1-(2-furyl)-1,2-butanediol extracted from total ion chromatogram.

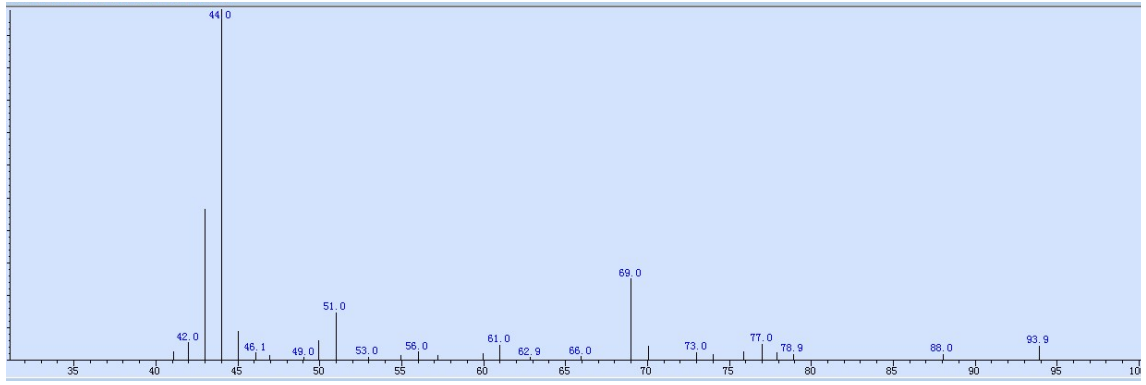

**Fig. S35** Mass spectrum of tetrahydrofuran-3,4-diol extracted from total ion chromatogram.

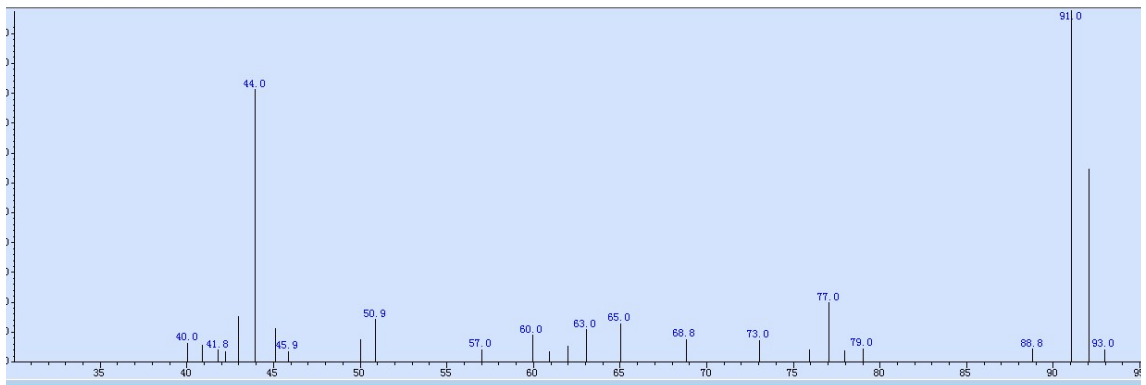

**Fig. S36** Mass spectrum of toluene extracted from total ion chromatogram.

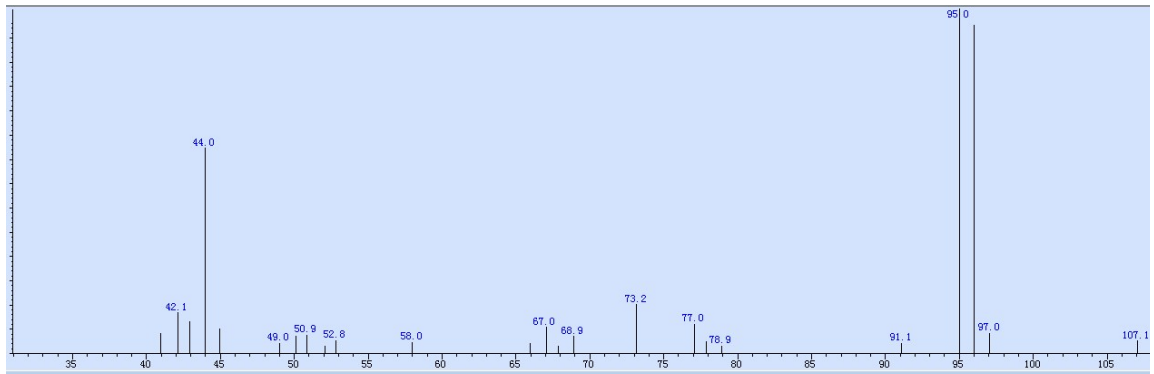

**Fig. S37** Mass spectrum of 2-formyl furan extracted from total ion chromatogram.



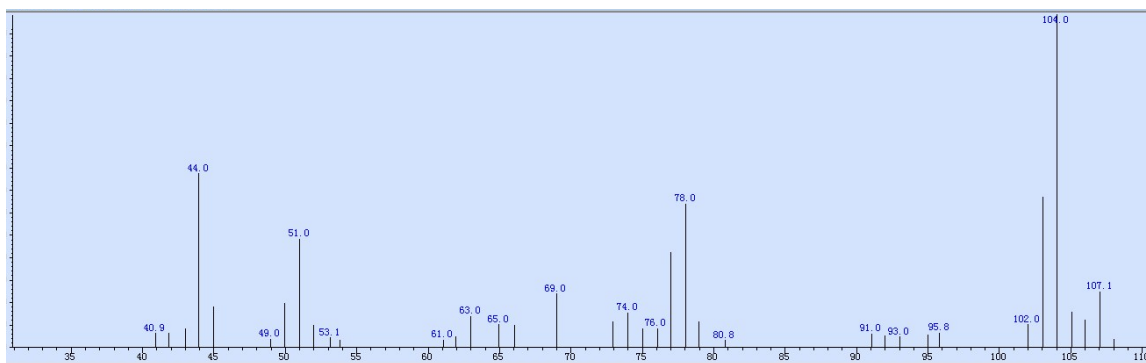

**Fig. S38** Mass spectrum of styrene extracted from total ion chromatogram.

### 7. Proposed degradation mechanisms of Derivative2.

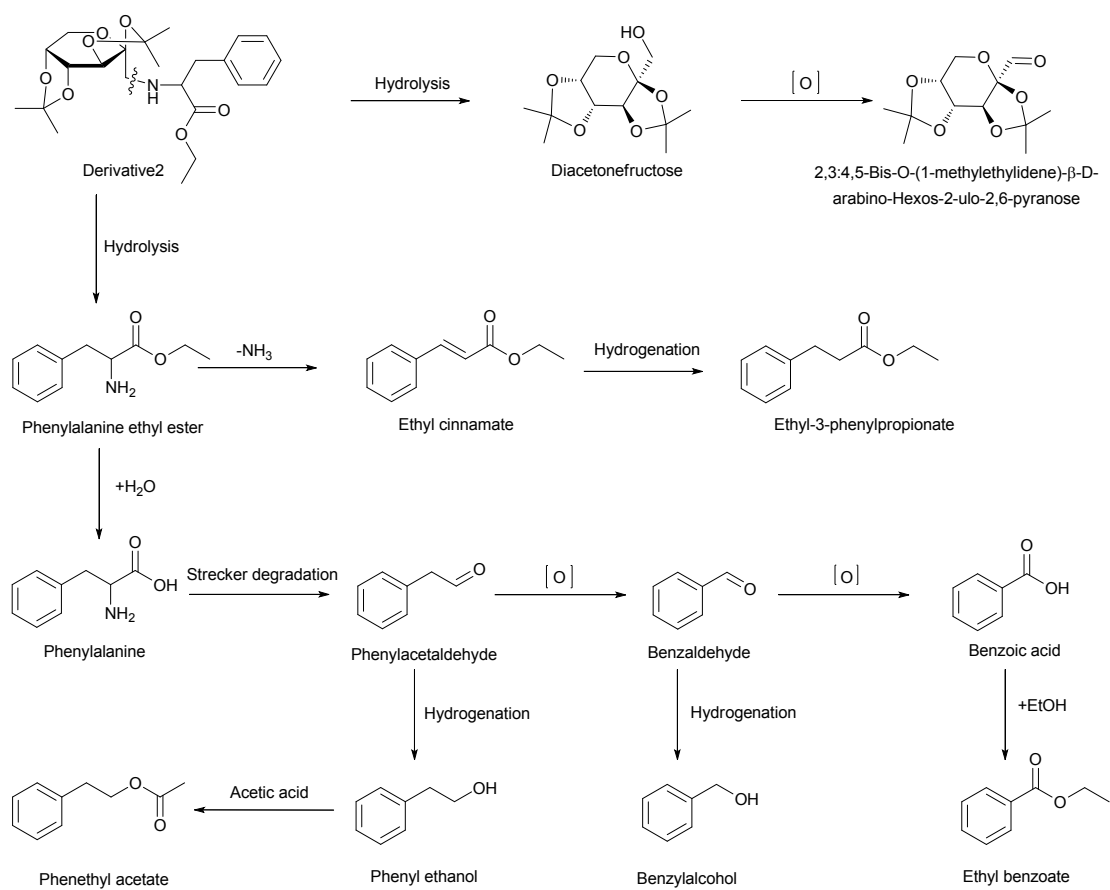

**Scheme S2.** Proposed degradation mechanisms of Derivative2.
